# Supplementary material
Source: Springer Nature journal article supplement (https://www.springermedizin.de/resource/supplementary/13031_2011_86_MOESM3_ESM.pdf/9645070)

Moderate Acute Malnutrition Rates and Supplementary Feeding Program Enrollment, 2007-2009<sup>a</sup>

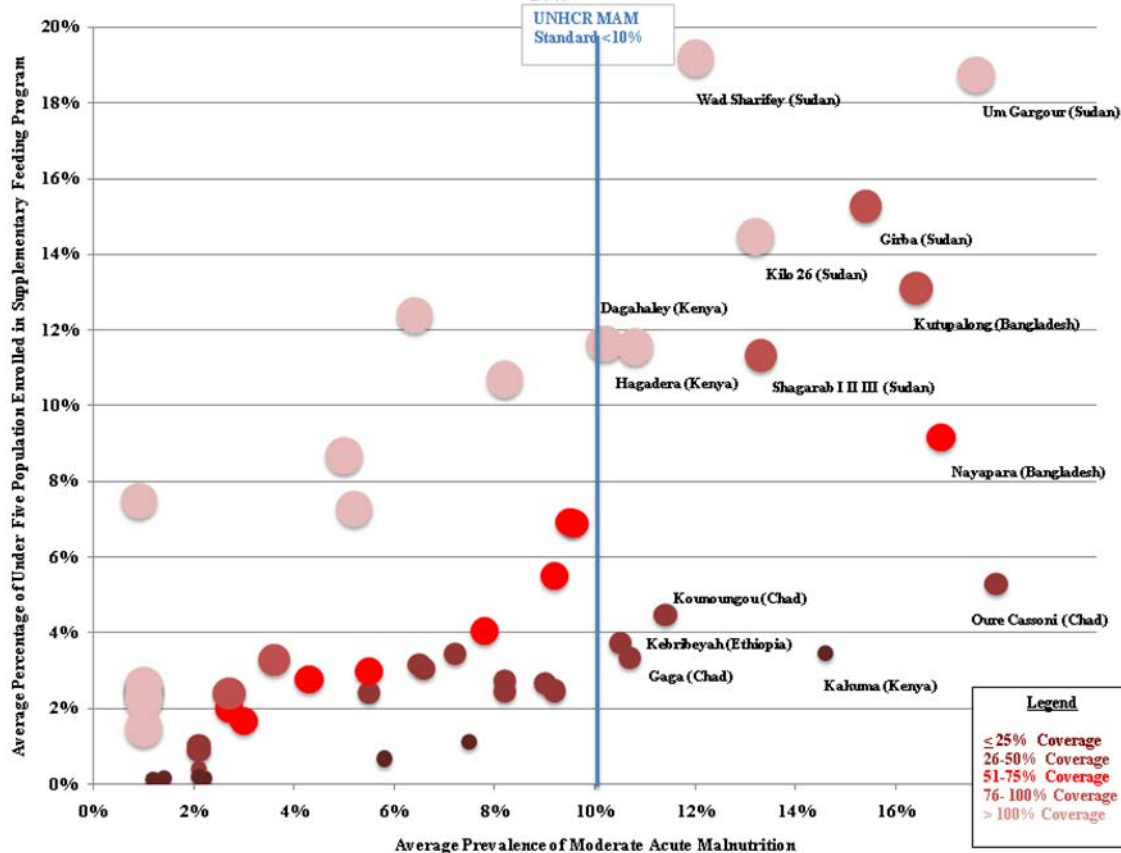

Supplement: MOESM3 [file 9645070]
